# Supplementary material
Source: PubMed Central journal article supplement (PMC391068)
Supplement: 7600160s2.pdf [file 7600160s2.pdf]

Supplementary Figure 2:

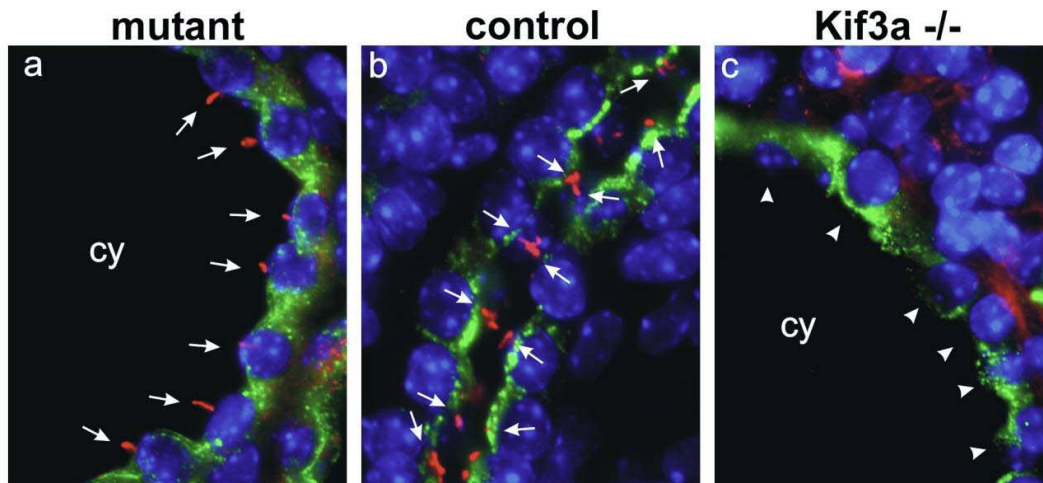

**Primary cilia are present in *HNF1 $\beta$* -inactivated cystic cells.** Immunofluorescence staining for primary cilia (acetylated tubulin/red), Aquaporin2 (green) and DNA (DAPI/blue) on kidney sections.

(a, b) Cilia are present in both control and mutant collecting duct cells. Morphometric analysis showed no significant difference in the ciliary length of mutant *versus* control mice. (c) As a control, no cilia were detected in *Kif3a* *-/-* polycystic kidneys (Lin *et al.*, 2003). cy: cysts.
