# Supplementary material
Source: PubMed Central journal article supplement (PMC391068)
Supplement: 7600160s3.pdf [file 7600160s3.pdf]

Supplementary table IA: Relative *in vivo* ChIP enrichments

| gene                 | mouse chromosome | position on chromosome [bp] | rel. position [kb] | ChIP enrichment of DNA fragments bound by |              |
|----------------------|------------------|-----------------------------|--------------------|-------------------------------------------|--------------|
|                      |                  |                             |                    | HNF1 $\alpha$                             | HNF1 $\beta$ |
| <i>Umod</i>          | 7                | 107755844                   | -1.139             | 2.99                                      | 8.43         |
| <i>Umod</i>          | 7                | 107755284                   | -0.579             | 1.18                                      | 2.59         |
| <i>Pkhd1</i>         | 1                | 20940423                    | -52.555            | 0.99                                      | 1.16         |
| <i>Pkhd1</i>         | 1                | 20928249                    | -40.381            | 0.52                                      | 0.52         |
| <i>Pkhd1</i>         | 1                | 20926033                    | -38.165            | 0.77                                      | 1.62         |
| <i>Pkhd1</i>         | 1                | 20925703                    | -37.835            | 1.05                                      | 1.78         |
| <i>Pkhd1</i>         | 1                | 20923267                    | -35.399            | 9.55                                      | 15.01        |
| <i>Pkhd1</i>         | 1                | 20922879                    | -35.011            | 10.35                                     | 13.95        |
| <i>Pkhd1</i>         | 1                | 20900132                    | -12.264            | 0.79                                      | 0.95         |
| <i>Pkhd1</i>         | 1                | 20891782                    | -3.914             | 0.80                                      | 0.78         |
| <i>Pkhd1</i>         | 1                | 20888077                    | -0.209             | 5.09                                      | 10.28        |
| <i>Pkhd1</i>         | 1                | 20887934                    | -0.066             | 4.69                                      | 11.12        |
| <i>Pkhd1</i>         | 1                | 20881010                    | 6.858              | 1.19                                      | 0.96         |
| <i>Pkhd1</i>         | 1                | 20876689                    | 11.179             | 0.81                                      | 1.50         |
| <i>Pkhd1</i>         | 1                | 20875612                    | 12.256             | 1.68                                      | 2.70         |
| <i>Pkhd1</i>         | 1                | 20875419                    | 12.449             | 1.20                                      | 2.98         |
| <i>Pkhd1</i>         | 1                | 20838702                    | 49.166             | 0.75                                      | 0.95         |
| <i>Pkd2</i>          | 5                | 101556553                   | 1.514              | 5.00                                      | 5.63         |
| <i>Pkd2</i>          | 5                | 101573351                   | 18.312             | 0.86                                      | 1.18         |
| <i>Pkd2</i>          | 5                | 101575700                   | 20.661             | 2.68                                      | 3.42         |
| <i>Pkd2</i>          | 5                | 101576002                   | 20.963             | 2.84                                      | 4.05         |
| <i>Pkd2</i>          | 5                | 101606947                   | 51.908             | 4.71                                      | 5.99         |
| <i>Pkd2</i>          | 5                | 101607219                   | 52.18              | 6.22                                      | 7.22         |
| <i>Nphp1</i>         | 2                | 129432620                   | 2.581              | 0.65                                      | 1.16         |
| <i>Nphp1</i>         | 2                | 129417385                   | 17.816             | 0.69                                      | 1.02         |
| <i>Tg737/Polaris</i> | 14               | 48088707                    | -6.64              | 1.51                                      | 2.30         |
| <i>Tg737/Polaris</i> | 14               | 48117867                    | 22.52              | 0.84                                      | 1.21         |
| <i>Tg737/Polaris</i> | 14               | 48149412                    | 54.065             | 0.84                                      | 1.03         |
| <i>Tg737/Polaris</i> | 14               | 48176968                    | 81.621             | 0.85                                      | 1.14         |
| <i>Pkd1</i>          | 17               | 23241631                    | 4.065              | 0.53                                      | 0.62         |

Chromosomal positions pertain to the murine genome assembly based on the Ensembl Mouse release 15.30 which is built around the NCBI 30 composite assembly. Relative positions are calculated with respect to the putative transcriptional start site of each gene.

**Supplementary table IB: Oligonucleotides used in ChIP experiments**

| gene                 | rel. position [Kb] | forward 5'->3'              | reverse 5'->3'                |
|----------------------|--------------------|-----------------------------|-------------------------------|
| <i>Umod</i>          | -1.139             | TGGCAGCAAGACATTCCTCAG       | CCCAGAACCTTGGCACTGTTT         |
| <i>Umod</i>          | -0.579             | CTAGTATTTTCAAATGATTGTGGTTGC | CATCTGGAATTATTTACCTGTTGC      |
| <i>Pkhd1</i>         | 49.166             | CTCACAACAAAGCCCCCTCA        | GCATCTGCAATGCCATTAC           |
| <i>Pkhd1</i>         | 12.449             | ACCCAGGAGAAAACCTTAGTCCCC    | AGCCGTCTAAGCACCTAGTGAGA       |
| <i>Pkhd1</i>         | 12.256             | CAGCCCTAATCAGGCATTCAG       | CCATCAGCTTGGCTAAACAGC         |
| <i>Pkhd1</i>         | 11.179             | CAGAAAGACCCGCTGCATTT        | TGCAGTTAATGAGAGGCATTCCG       |
| <i>Pkhd1</i>         | 6.858              | CACGCACACCCCCAATAGAC        | GGAACATAACCTGATCGAAAGGAG      |
| <i>Pkhd1</i>         | -0.066             | GTCCTGGCTAAACGTGCACC        | TGCCCTGTGGTCATTTGTGA          |
| <i>Pkhd1</i>         | -0.209             | GTCTAGCCAGTGTGACCAGTGG      | TCTGGCACCTCCTTTCAGTTACT       |
| <i>Pkhd1</i>         | -3.914             | TTTATTTGGACTGATGCTTTGAGG    | GAATTTCCCCACCATGATGG          |
| <i>Pkhd1</i>         | -12.264            | CTAACCTCCCAACAAGTCTCCG      | GGCACCACAGTCACAGATTCTG        |
| <i>Pkhd1</i>         | -34.756            | AGTGCCATTCATTTGTCCACC       | TAACAGAGCATGGCGAGGC           |
| <i>Pkhd1</i>         | -35.011            | ATGGAGTCCATTGTGAACATCG      | TGGCCTTGAAGTGGATCCTT          |
| <i>Pkhd1</i>         | -35.399            | GCCAAGAGAAAACACAGGACAGG     | TGCAAAGCACAGAGGCCTTT          |
| <i>Pkhd1</i>         | -37.835            | TCTCTTGTTCCCTGTCATCGAA      | TGGTGATTTCAGCTTAGCAACTACAC    |
| <i>Pkhd1</i>         | -38.165            | ACTCAGGCACAACCTGACTGG       | AACAACGGAAGCAGCTGAGAA         |
| <i>Pkhd1</i>         | -40.381            | CCACCACAGTGAGTCCTGGA        | CTGAATCTTGCGTTTCGTGTGT        |
| <i>Pkhd1</i>         | -52.555            | CCCTGTGCTGAGCTATCTTCTCA     | AAGTGCGAAATGACGTAACAGGT       |
| <i>Pkd2</i>          | 1.514              | TCCAGGCAGTGTGAGTTAGGC       | AGGACCAGGATTTGGATGGAG         |
| <i>Pkd2</i>          | 18.312             | TCCCATGATGTGGTGCTCAG        | TTTTTCATTTCTCTCCAGCCT         |
| <i>Pkd2</i>          | 20.661             | GGAAAAC TAGCCCATGCAGG       | CAGCCTTGATTCTTGGTCCCT         |
| <i>Pkd2</i>          | 20.963             | TGACGAATGGTAGTCCTCTGTCA     | GCCAAGGTTTGATAGCCAGAGA        |
| <i>Pkd2</i>          | 51.908             | TTTATGATGTCGCAGCATTGG       | CCATCCCCTACAGCAGTGGTT         |
| <i>Pkd2</i>          | 52.18              | AAACCAAGTGCCAGACAGATTTAAG   | TTGTTTTGTGGTTCAAATTGAGTCTAC   |
| <i>Nphp1</i>         | 2.581              | TTTGGTAGCCCATTTTGGAGC       | TGATTGGTCAGTCCCCTGTCA         |
| <i>Nphp1</i>         | 17.816             | CTCATGCCCAAGTTGATTTTCATAT   | AAGAGCTCAGATCATTTCTAGTAACAGGA |
| <i>Tg737/Polaris</i> | -6.64              | GCAGAGCAGGCAAAGAGCA         | GGAACAGTGGCAGACAGAAGG         |
| <i>Tg737/Polaris</i> | 22.52              | GGATCACACCTGCTAGAATGACC     | AGCATCTCCATCAATACCTGTCC       |
| <i>Tg737/Polaris</i> | 54.065             | ATTGGTAAGTTCAACATGGCAGAG    | AAAGAAGGCTGGCAATTCCTT         |
| <i>Tg737/Polaris</i> | 81.621             | ATGTCTTCAACAGCCCCTAG        | GCTGGAGACTGAGAAATCCCG         |
| <i>Pkd1</i>          | 4.065              | TGAAGGCAGAGGCAAGATGG        | CATGAACCAAGCTGGATCCA          |
| <i>alpha-Actin 2</i> | -                  | GATGATATCCACGCGCAATG        | GCTTCAAAGGACATCCAGAGTGT       |
