# Supplementary material
Source: PubMed Central journal article supplement (PMC391068)
Supplement: 7600160s4.pdf [file 7600160s4.pdf]

**Supplementary table II: Oligonucleotides used for quantitative RT-PCR experiments**

| <b>Gene symbol</b>  | <b>Gene name</b>                                                           | <b>RefSeq (NCBI)</b> | <b>Primers (5'-3')</b>                                   |
|---------------------|----------------------------------------------------------------------------|----------------------|----------------------------------------------------------|
| Aqp2                | aquaporin 2                                                                | NM_009699            | CCATTGGTTTTCTCTGTTACCCCTG<br>CGGTGAAATAGATCCCAAGGAG      |
| Avpr2               | arginine vasopressin receptor 2                                            | NM_019404            | CTAATAAAAAGTTGCAGTTCATTTTCCAC<br>TGGTCCAAGGAAATTTTTTCCAT |
| B2m                 | beta-2 microglobulin                                                       | NM_009735            | TGCTATCCAGAAAACCCCTCA<br>GCGGGTGGAACTGTGTTACG            |
| Kif3a               | kinesin family member 3A                                                   | NM_008443            | AAGCAAAAACCTGGAGCCACAG<br>TGATTTTGGTAGCTTCCTTGAGG        |
| Nphp1               | nephronophthisis 1 (juvenile) homolog (human)                              | NM_016902            | AGAGAGGAGAGTTAAGCTGTGGCT<br>TGGCATCGAAAAGCTTAAGAAAC      |
| Invs/Nphp2          | inversin                                                                   | NM_010569            | ACTTGTTACCCAGCATATGTGGTC<br>AGGAGAAAACATTTGAACCTGTCTT    |
| 3632410F03Rik/Nphp3 | RIKEN cDNA 3632410F03 gene                                                 | NM_028721            | ACAACCTATCCCCCTAACGTTTTT<br>TGACGGTTAGCTTTGCCCTT         |
| Nphp4               | nephronophthisis 4 (juvenile) homolog (human)                              | NM_153424            | TTGGCAATAAGCCAGAATCTCC<br>TGATACAGCCTCAACCGTTTGTC        |
| Pkd1                | polycystic kidney disease 1 homolog                                        | NM_013630            | GCTGCATGCCAGTTCTTTTG<br>TTTTAAAGTGCAGAAGCCCCA            |
| Pkd2                | polycystic kidney disease 2                                                | NM_008861            | CATGTCTCGATGTGCCAAAGA<br>ATGGAGAACATTATGGTGAAGCC         |
| Pkd2l2              | polycystic kidney disease 2-like 2                                         | NM_016927            | TTGTCCTTTGCTAACAGCCGT<br>CGCAGGCTCCCTTCATTGTTT           |
| Pkhd1               | polycystic kidney and hepatic disease 1                                    | NM_153179            | AAGTCAAGGGCCATCACATC<br>ATGTTTCTGGTCAACAGCCC             |
| Slc12a1/Nkcc2       | solute carrier family 12, member 1                                         | NM_011389            | CTGGCCTCATATGCGCTTATT<br>AGATTTGGCATAACGAGGCATG          |
| TgN737Rpw/Polaris   | transgene insert site 737, insertional mutation, polycystic kidney disease | NM_009376            | GCAGGCTTCAACCT CATCCTTA<br>TTTCTCCCAGTCTCCAATGG          |
| Umod/THP            | uromodulin                                                                 | NM_009470            | TCCAGCTTGCACGTACTCTTTCT<br>CCAACCTGTTTTTGATGGTGAGG       |
